# Supplementary material for: Erythropoietin (EPO) ameliorates obesity and glucose homeostasis by promoting thermogenesis and endocrine function of classical brown adipose tissue (BAT) in diet-induced obese mice
Source: PubMed Central journal article supplement (PMC5348037; doi:10.1371/journal.pone.0173661), 2017-03-13
Supplement: pone.0173661.s001.pdf [file pone.0173661.s001.pdf]

| Primers                | Sequnces                    |
|------------------------|-----------------------------|
| PRDM16 forward         | CAGCACGGTGAAGCCATTC         |
| PRDM16 reverse         | GGCGTGCATCCGCTTGT           |
| PPAR $\alpha$ forward  | ATGCCAGTACTGCCGTTTTTC       |
| PPAR $\alpha$ reverse  | CCGAATCTTTTCAGGTCGTGT       |
| PPAR $\gamma$ forward  | CCAGAGTCTGCTGATCTGC         |
| PPAR $\gamma$ reverse  | GCCACCTCTTTGCTCTGCTC        |
| PGC1 $\alpha$ forward  | TGAACGCACCTTAAGTGT GGA      |
| PGC1 $\alpha$ reverse  | GGGTTATCTTGGTTGGCTTTATGA    |
| UCP1 forward           | AGGCTTCCAGTACCATTAGGT       |
| UCP1 reverse           | CTGAGTGAGGCAAAGCTGATTT      |
| aP2 forward            | CAGAAGTGGGATGGAAAGTCG       |
| aP2 reverse            | CGACTGACTATTGTAGTGTTTGA     |
| CPT1 forward           | CCACTGATGAAGGAGGGAGAC       |
| CPT1 reverse           | TATGGGTTGGGGTGATGTAGA       |
| Cox7a1 forward         | CCGACAATGACCTCCCAGTA        |
| Cox7a1 reverse         | TGTTTGTCCAAGTCCTCCAA        |
| Cox8b forward          | GAACCATGAAGCCAACGACT        |
| Cox8b reverse          | GCGAAGTTCACAGTGGTTCC        |
| $\beta$ 3ADR forward   | TCTAGTTCCCAGCGGAGTTTTTCATCG |
| $\beta$ 3ADR reverse   | CGCGCACCTTCATAGCCATCAAACC   |
| Mef2c forward          | TCTGCCCTCAGTCAGTTGG         |
| Mef2c reverse          | CGTGGTGTGTTGTGGGTATC        |
| FGF21 forward          | AGATCAGGGAGGATGGAACA        |
| FGF21 reverse          | TCAAAGTGAGGCGATCCATA        |
| GCK forward            | CAACTGGACCAAGGGCTTCAA       |
| GCK reverse            | TGTGGCCACCGTGTCATTC         |
| G6Pase forward         | TCGTGGCTGGAGTCTTGTC         |
| G6Pase reverse         | GGCTGGCAAAGGGTGTAGTG        |
| PEPCK forward          | AGCCTTTGGTCAACAACCTGG       |
| PEPCK reverse          | TGCTTCGGGGTTAGTTATG         |
| $\beta$ -actin forward | GGCTGTATTCCCCTCCATCG        |
| $\beta$ -actin reverse | CCAGTTGGTAACAATGCCATGT      |

Supplementary Table S1. Sequences of primers for quantitative RT-PCR
